# Supplementary material
Source: Royal Society of Chemistry journal article supplement (doi:10.1039/d6fb00056h)
Supplement: d6fb00056h1.pdf [file d6fb00056h1.pdf]

## **SUPPORTING INFORMATION**

### **Cyclodextrin/Caffeic Acid Nanofibers with Enhanced Antioxidant Activity, Fast-Release and Fast-Disintegrating Properties**

Asli Celebioglu<sup>1</sup>, Kubra Ertan<sup>1,2</sup>, Mahmoud Aboelkheir<sup>1</sup>, Tamer Uyar<sup>1\*</sup>

<sup>1</sup>Fiber Science Program, Department of Human Centered Design, College of Human Ecology,  
Cornell University, Ithaca, NY 14853, USA

<sup>2</sup>Department of Food Engineering, Faculty of Engineering and Architecture, Burdur Mehmet  
Akif Ersoy University, Istiklal Campus, 15030 Burdur, Turkey

\*Corresponding Author

Email Address: [tu46@cornell.edu](mailto:tu46@cornell.edu)

Phone Number: +1 (607) 255-4658

Mail Address: 37 Forest Home Drive, T51 HEB, Cornell University, Ithaca, NY, 14853

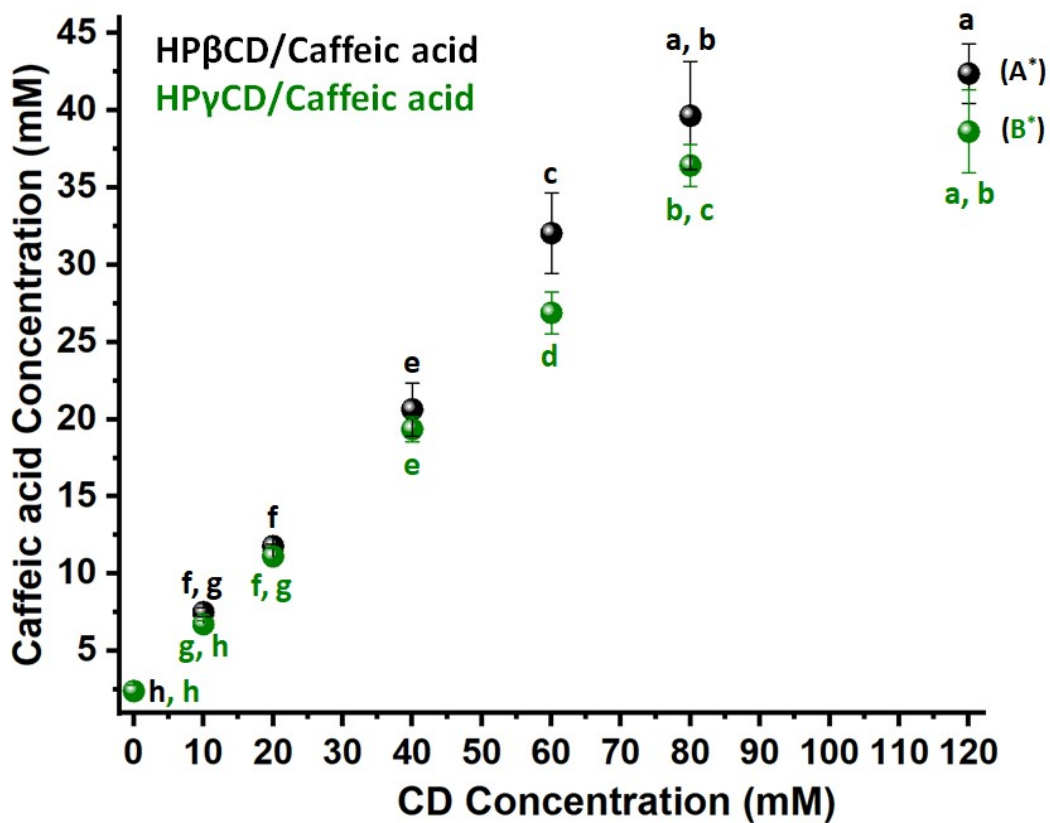

**Fig. S1.** Phase solubility diagram of HPβCD/caffeic acid and HPγCD/caffeic acid systems. (The comparison lettering for mean caffeic acid concentrations (mM) at each CD concentration (mM) is indicated using lowercase letters, while uppercase letters represent comparisons within each CD type. Means that do not share a common letter are significantly different ( $p < 0.05$ )).

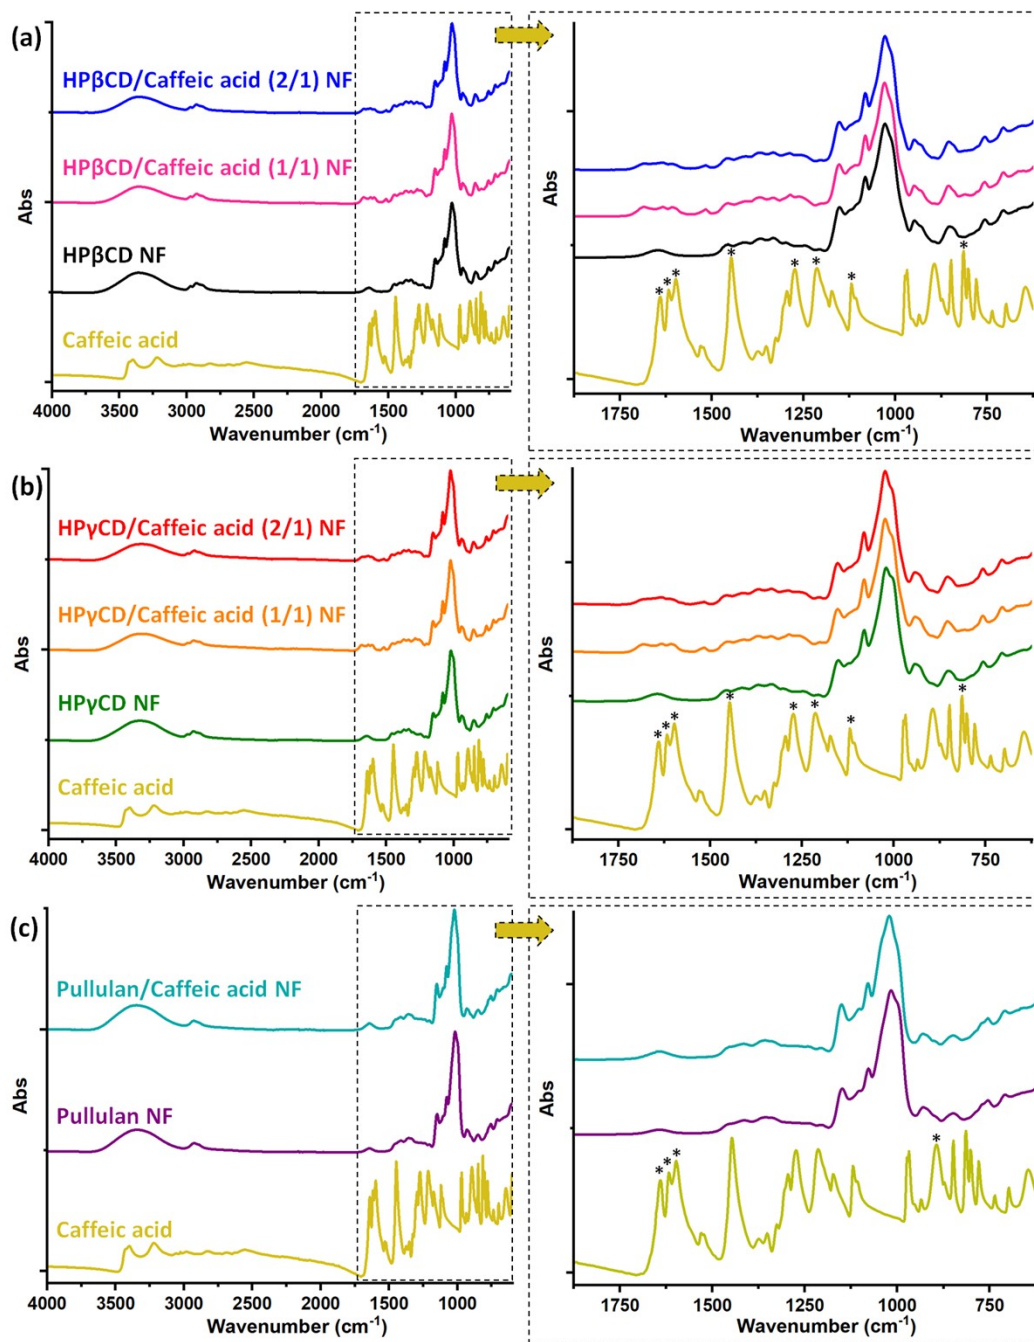

**Fig. S2.** The full and expanded range FTIR spectra of Caffeic acid powder, (a) HP $\beta$ CD NF, HP $\beta$ CD/Caffeic acid (1/1) NF, HP $\beta$ CD/Caffeic acid (2/1) NF, (b) HP $\gamma$ CD NF, HP $\gamma$ CD/Caffeic acid (1/1) NF, HP $\gamma$ CD/Caffeic acid (2/1) NF and (c) Pullulan NF, Pullulan/Caffeic acid NF (NF: nanofibers).

**Table S1.** List of absorption band assignments of caffeic acid for FTIR spectra of caffeic acid and CD/caffeic acid nanofibers (NF).

| <b>Functional group</b>      | <b>Absorption peak of caffeic acid (cm<sup>-1</sup>)</b> | <b>Absorption peak of caffeic acid HPβCD NF (cm<sup>-1</sup>)</b> | <b>Absorption peak of caffeic acid HPγCD NF (cm<sup>-1</sup>)</b> |
|------------------------------|----------------------------------------------------------|-------------------------------------------------------------------|-------------------------------------------------------------------|
| ν(C=O)                       | 1641                                                     | 1685                                                              | 1683                                                              |
| ν(C=C)                       | 1617                                                     | 1634                                                              | 1634                                                              |
| ν(C=C)                       | 1599                                                     | 1606                                                              | 1603                                                              |
| ν(C=C)                       | 1446                                                     | 1516                                                              | 1517                                                              |
| ν(C-OH)                      | 1273                                                     | 1287                                                              | 1286                                                              |
| β(OH) + β(CH) <sub>C=C</sub> | 1214                                                     | 1250                                                              | 1251                                                              |
| β(CH)                        | 1118                                                     | 1116                                                              | 1114                                                              |
| β(C=O)                       | 813                                                      | 809                                                               | 809                                                               |

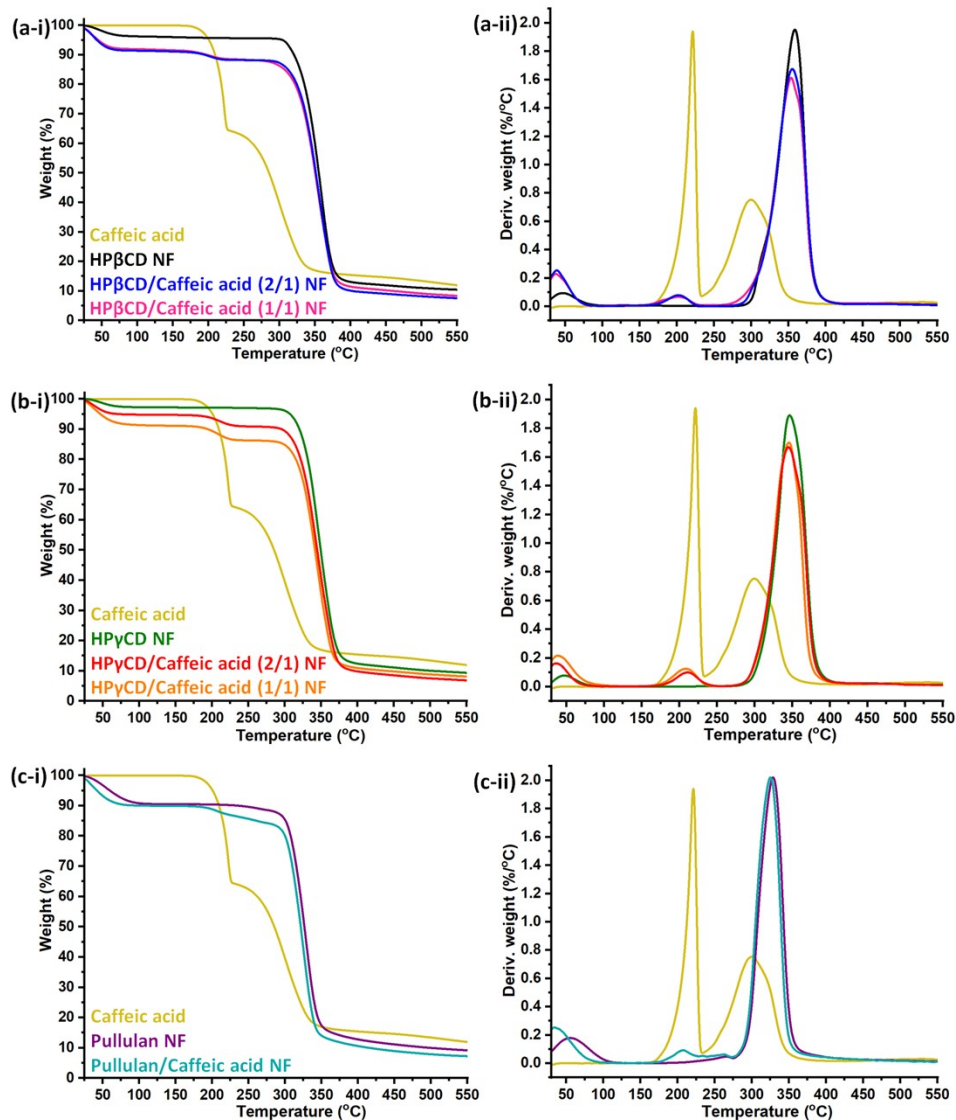

**Fig. S3.** (i) TGA thermograms and (i) derivative graphs (DTG) of Caffeic acid powder, (a) HPβCD NF, HPβCD/Caffeic acid (1/1) NF, HPβCD/Caffeic acid (2/1) NF, (b) HPγCD NF, HPγCD/Caffeic acid (1/1) NF, HPγCD/Caffeic acid (2/1) NF and (c) Pullulan NF, Pullulan/Caffeic acid NF (NF: nanofibers).

**Table S2.** The disintegration profile analysis of electrospun nanofibers.

| <b>Video</b> | <b>Sample Type</b>                   | <b><math>t_0</math><br/>(s:ms)</b> | <b><math>t_e</math><br/>(s:ms)</b> | <b>Total<br/>Duration<br/>(s:ms)</b> |
|--------------|--------------------------------------|------------------------------------|------------------------------------|--------------------------------------|
| Video S1     | HP $\beta$ CD/caffeic acid (1/1) NF  | 01:23                              | 07:15                              | 05:92                                |
| Video S2     | HP $\gamma$ CD/caffeic acid (1/1) NF | 01:10                              | 06:05                              | 04:95                                |
| Video S3     | HP $\beta$ CD/caffeic acid (2/1) NF  | 01:05                              | 06:20                              | 05:15                                |
| Video S4     | HP $\gamma$ CD/caffeic acid (2/1) NF | 01:25                              | 07:35                              | 06:10                                |
| Video S5     | Pullulan/caffeic acid NF             | 01:15                              | 09:10                              | 07:95*                               |

\*at the end of duration, sample remained as a thin transparent layer without complete disintegration.

**Table S3.** Mean interactions obtained from the Tukey post hoc comparison test. Mean release values at each time point and for each sample type are presented; values that do not share a common letter are significantly different ( $p < 0.05$ ).

| Sample Type                          | Time (min) | Mean   | Groups |   |   |   |   |   |  |
|--------------------------------------|------------|--------|--------|---|---|---|---|---|--|
| HP $\beta$ CD/caffeic acid (2/1) NF  | 6          | 102.6* | A      |   |   |   |   |   |  |
| HP $\beta$ CD/caffeic acid (2/1) NF  | 4          | 102.0* | A      |   |   |   |   |   |  |
| HP $\beta$ CD/caffeic acid (2/1) NF  | 2          | 101.9* | A      |   |   |   |   |   |  |
| HP $\beta$ CD/caffeic acid (2/1) NF  | 10         | 101.7* | A      |   |   |   |   |   |  |
| HP $\beta$ CD/caffeic acid (2/1) NF  | 1          | 101.5* | A      |   |   |   |   |   |  |
| HP $\beta$ CD/caffeic acid (2/1) NF  | 8          | 101.5* | A      |   |   |   |   |   |  |
| HP $\gamma$ CD/caffeic acid (2/1) NF | 4          | 99.2   | A      |   |   |   |   |   |  |
| HP $\gamma$ CD/caffeic acid (2/1) NF | 6          | 99.0   | A      |   |   |   |   |   |  |
| HP $\gamma$ CD/caffeic acid (2/1) NF | 2          | 98.6   | A      |   |   |   |   |   |  |
| HP $\beta$ CD/caffeic acid (1/1) NF  | 6          | 98.5   | A      |   |   |   |   |   |  |
| HP $\beta$ CD/caffeic acid (1/1) NF  | 10         | 98.0   | A      |   |   |   |   |   |  |
| HP $\beta$ CD/caffeic acid (1/1) NF  | 8          | 97.5   | A      |   |   |   |   |   |  |
| HP $\gamma$ CD/caffeic acid (2/1) NF | 10         | 97.4   | A      |   |   |   |   |   |  |
| HP $\beta$ CD/caffeic acid (1/1) NF  | 4          | 97.2   | A      |   |   |   |   |   |  |
| HP $\beta$ CD/caffeic acid (1/1) NF  | 2          | 97.1   | A      |   |   |   |   |   |  |
| HP $\gamma$ CD/caffeic acid (2/1) NF | 8          | 97.0   | A      |   |   |   |   |   |  |
| HP $\gamma$ CD/caffeic acid (2/1) NF | 1          | 96.5   | A      |   |   |   |   |   |  |
| HP $\gamma$ CD/caffeic acid (1/1) NF | 2          | 96.2   | A      |   |   |   |   |   |  |
| HP $\beta$ CD/caffeic acid (2/1) NF  | 0.5        | 95.5   | A      |   |   |   |   |   |  |
| HP $\gamma$ CD/caffeic acid (1/1) NF | 6          | 95.2   | A      |   |   |   |   |   |  |
| HP $\beta$ CD/caffeic acid (1/1) NF  | 1          | 94.8   | A      |   |   |   |   |   |  |
| HP $\gamma$ CD/caffeic acid (1/1) NF | 8          | 94.3   | A      | B |   |   |   |   |  |
| HP $\gamma$ CD/caffeic acid (1/1) NF | 10         | 94.2   | A      | B |   |   |   |   |  |
| HP $\gamma$ CD/caffeic acid (1/1) NF | 4          | 94.1   | A      | B |   |   |   |   |  |
| HP $\gamma$ CD/caffeic acid (1/1) NF | 1          | 93.8   | A      | B |   |   |   |   |  |
| HP $\gamma$ CD/caffeic acid (1/1) NF | 0.5        | 91.8   | A      | B |   |   |   |   |  |
| HP $\beta$ CD/caffeic acid (1/1) NF  | 0.5        | 89.8   | A      | B | C |   |   |   |  |
| HP $\gamma$ CD/caffeic acid (1/1) NF | 0.5        | 88.6   | A      | B | C |   |   |   |  |
| Pullulan/caffeic acid NF             | 10         | 78.1   | A      | B | C |   |   |   |  |
| Pullulan/caffeic acid NF             | 8          | 75.7   | A      | B | C |   |   |   |  |
| Pullulan/caffeic acid NF             | 6          | 66.0   |        | B | C | D |   |   |  |
| Pullulan/caffeic acid NF             | 4          | 62.9   |        |   | C | D |   |   |  |
| Pullulan/caffeic acid NF             | 2          | 38.7   |        |   |   | D | E |   |  |
| Pullulan/caffeic acid NF             | 1          | 32.3   |        |   |   |   | E |   |  |
| Pullulan/caffeic acid NF             | 0.5        | 21.5   |        |   |   |   | E | F |  |
| HP $\gamma$ CD/caffeic acid (2/1) NF | 0          | 0      |        |   |   |   |   | F |  |
| Pullulan/caffeic acid NF             | 0          | 0      |        |   |   |   |   | F |  |
| HP $\gamma$ CD/caffeic acid (1/1) NF | 0          | 0      |        |   |   |   |   | F |  |
| HP $\beta$ CD/caffeic acid (2/1) NF  | 0          | 0      |        |   |   |   |   | F |  |
| HP $\beta$ CD/caffeic acid (1/1) NF  | 0          | 0      |        |   |   |   |   | F |  |

\*Values slightly exceeding 100% are attributed to experimental and analytical variability and were considered to be within the acceptable margin of error.

**Table S4.** The lettering obtained from the Tukey post hoc comparison test shows the comparison of mean release values for each sample type; values that do not share a common letter are significantly different ( $p < 0.05$ ).

| <b>Sample Type</b>                   | <b>Mean</b> | <b>Groups</b> |
|--------------------------------------|-------------|---------------|
| HP $\beta$ CD/caffeic acid (2/1) NF  | 88.4        | A             |
| HP $\gamma$ CD/caffeic acid (2/1) NF | 84.9        | A             |
| HP $\beta$ CD/caffeic acid (1/1) NF  | 84.1        | A             |
| HP $\gamma$ CD/caffeic acid (1/1) NF | 82.0        | A             |
| Pullulan/caffeic acid NF             | 46.9        | B             |

## Application of release data on mathematical models:

**Zero order model:** The release of drug can be represented by the equation:

$$C_0 - C_t = K_0 t$$

$$C_t = C_0 - K_0 t$$

$C_t$  is the amount of drug released at time  $t$ ,  $C_0$  is the initial concentration of drug at time  $t=0$ ,  $K_0$  is the zero-order rate constant. Here, the slope of the cumulative drug release vs. time plot gives the correlation coefficient ( $R^2$ ) value.

**First order model:** The release of drug can be represented by the equation:

$$dC/dt = -K_1 C$$

$K_1$  is the first order rate constant, expressed in  $\text{time}^{-1}$  or per hour

After rearranging and integrating the equation,

$$\log C = \log C_0 - K_1 t / 2.303$$

$C_0$  is the initial concentration of the drug,  $C$  is the percent of drug remaining at time  $t$ . Here, the slope of the log % of drug remaining vs. time gives the  $R^2$  value.

**Higuchi model:** Higuchi release model is represented as:

$$M_t / M_\infty = K_h t^{1/2}$$

where  $M_t / M_\infty$  is the fraction of drug released at each time point ( $t$ ),  $M_t$  is the amount of drug released in time  $t$ ,  $M_\infty$  is the amount of drug released after time  $\infty$ , and  $K_h$  represents the Higuchi release kinetic constant. Here, the plot is obtained by cumulative percentage drug release vs. square root of time and the slope gives  $R^2$  value.

**Korsmeyer-peppas model:** Korsmeyer-peppas model is represented as:

$$M_t / M_\infty = K_{kp} t^n$$

$$\log (M_t / M_\infty) = \log K_{kp} + n \log t$$

$M_t / M_\infty$  is a fraction of drug released at time  $t$ ,  $M_t$  is the amount of drug released in time  $t$ ,  $M_\infty$  is the amount of drug released after time  $\infty$ ,  $n$  is the diffusional exponent or drug release exponent,  $K_{kp}$  is the Korsmeyer release rate constant. Here, the graph is plotted between log cumulative % drug release vs. log time and the slope gives  $R^2$  value.

**Table S5.** The correlation coefficient ( $R^2$ ) values of samples calculated by using different kinetic models.

| <b>Kinetic model</b>                    | <b>HP<math>\beta</math>CD/<br/>Caffeic acid<br/>(1/1) NF</b> | <b>HP<math>\gamma</math>CD/<br/>Caffeic acid<br/>(1/1) NF</b> | <b>HP<math>\beta</math>CD/<br/>Caffeic acid<br/>(2/1) NF</b> | <b>HP<math>\gamma</math>CD/<br/>Caffeic acid<br/>(2/1) NF</b> | <b>Pullulan/<br/>Caffeic acid<br/>NF</b> |
|-----------------------------------------|--------------------------------------------------------------|---------------------------------------------------------------|--------------------------------------------------------------|---------------------------------------------------------------|------------------------------------------|
| Zero-order                              | 0.2272                                                       | 0.2021                                                        | 0.2056                                                       | 0.2041                                                        | 0.8500                                   |
| First-order                             | 0.4681                                                       | 0.2389                                                        | 0.2969                                                       | 0.2391                                                        | 0.9520                                   |
| Higuchi                                 | 0.4480                                                       | 0.4175                                                        | 0.4212                                                       | 0.4215                                                        | 0.9768                                   |
| Korsmeyer-<br>Peppas                    | 0.7698                                                       | 0.7643                                                        | 0.7646                                                       | 0.7652                                                        | 0.9598                                   |
| Diffusion<br>exponent<br>( $n$ value) * | 0.6733                                                       | 0.6672                                                        | 0.6782                                                       | 0.6272                                                        | 0.6751                                   |

\*calculated by the linear regression of Korsmeyer-Peppas equation of  $\log(M_t/M_\infty)$  versus  $\log t$ .

**Table S6.** The lettering obtained from the Tukey post hoc comparison test shows the comparison of mean antioxidant performance (%) for each sample type; values that do not share a common letter are significantly different ( $p < 0.05$ ).

| <b>Sample Type</b>                   | <b>Mean</b> | <b>Groups</b> |
|--------------------------------------|-------------|---------------|
| HP $\beta$ CD/caffeic acid (1/1) NF  | 64.4        | A             |
| HP $\gamma$ CD/caffeic acid (1/1) NF | 63.9        | A             |
| HP $\beta$ CD/caffeic acid (2/1) NF  | 50.8        | B             |
| HP $\gamma$ CD/caffeic acid (2/1) NF | 48.0        | B             |
| Pullulan/caffeic acid NF             | 30.5        | C             |
